# Supplementary material
Source: PubMed Central journal article supplement (PMC6442067)
Supplement: supp_RA118.006922_142260_2_supp_273081_plxrm3.pdf [file supp_RA118.006922_142260_2_supp_273081_plxrm3.pdf]

Munc18-2, but not Munc18-1 or Munc18-3, regulates platelet exocytosis, hemostasis, and thrombosis

**Eduardo I. Cardenas<sup>1,2</sup>, Ricardo Gonzalez<sup>1,2</sup>, Keegan Breaux<sup>1</sup>, Qi Da<sup>3,4</sup>, Berenice A. Gutierrez<sup>1,2</sup>,  
Marco A. Ramos<sup>1</sup>, Rodolfo A. Cardenas<sup>1,5</sup>, Alan R. Burns<sup>6</sup>, Rolando E. Rumbaut<sup>3,4</sup>, Roberto  
Adachi<sup>1\*</sup>**

<sup>1</sup>Department of Pulmonary Medicine, The University of Texas MD Anderson Cancer Center, Houston, Texas 77030, <sup>2</sup>Tecnologico de Monterrey, Escuela de Ingenieria y Ciencias, Monterrey, Nuevo Leon 64849, Mexico, <sup>3</sup>Center for Translational Research on Inflammatory Diseases (CTRID), Michael E. DeBakey Veterans Affairs Medical Center, Houston, Texas 77030, <sup>4</sup>Department of Medicine, Baylor College of Medicine, Houston, Texas 77030, <sup>5</sup>Tecnologico de Monterrey, Escuela de Medicina y Ciencias de la Salud, Monterrey, Nuevo León 64710, México and <sup>6</sup>College of Optometry, University of Houston, Houston, Texas 77204.

## **SUPPORTING INFORMATION**

### **Supplemental Figures**

|                                                                                                               |     |
|---------------------------------------------------------------------------------------------------------------|-----|
| Figure S1. Deletion of Munc18-2 impairs dense granule release in platelets regardless of the agonist used.    | S-2 |
| Figure S2. Deletion of Munc18-2 impairs alpha and lysosomal granule release in thrombin-stimulated platelets. | S-3 |
| Table S1. Summary of results of secretion assays                                                              | S-4 |
| Figure S3. Platelets lacking Munc18-2 adhere to collagen but do not from thrombi under shear stress.          | S-5 |

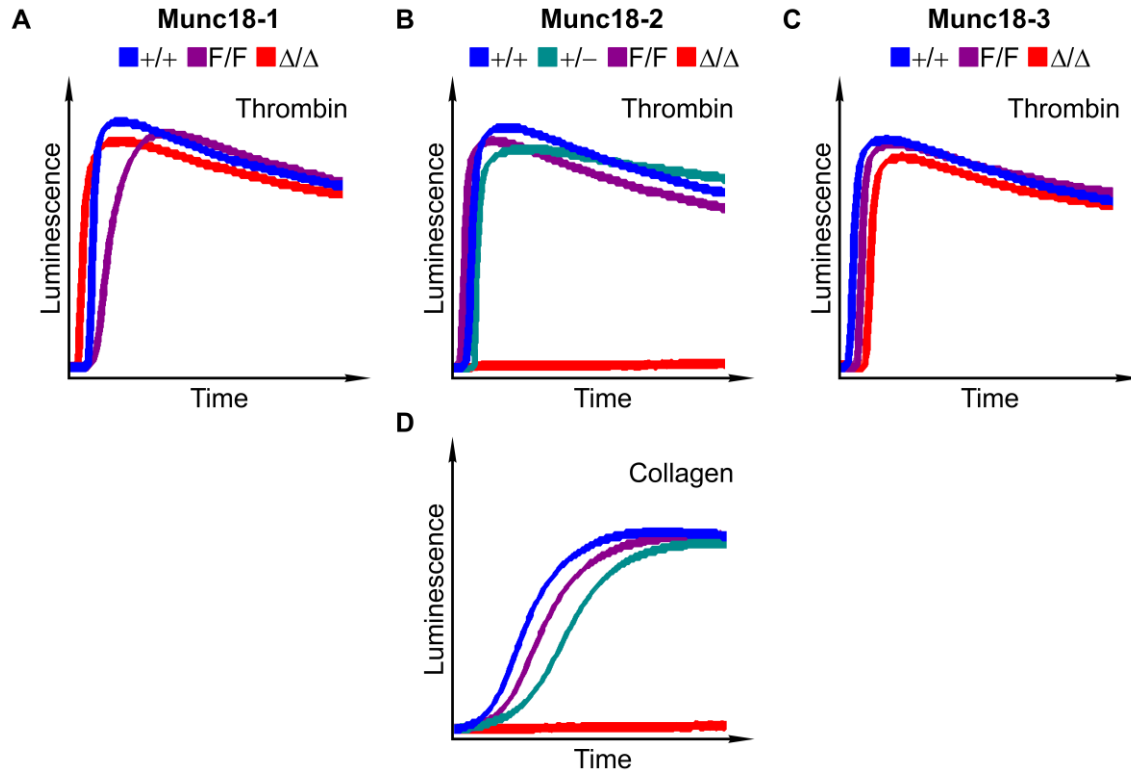

**Figure S1. Deletion of Munc18-2 impairs dense granule release in platelets regardless of the agonist used.** Samples from Munc18-1 (A), Munc18-2 (B and D), and Munc18-3 (C) mutant mice were stimulated with thrombin (1 U/ml) or collagen (10 µg/ml). A-D, representative tracings of ATP release (dense granules) measured by luminometry in whole blood.

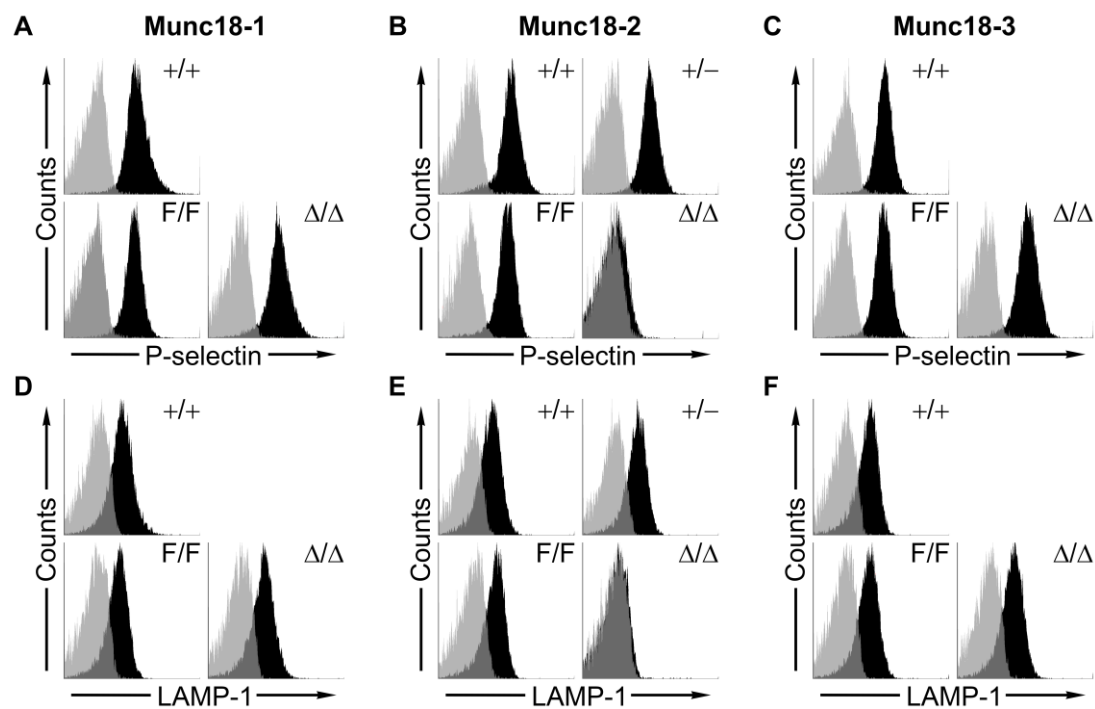

**Figure S2. Deletion of Munc18-2 impairs alpha and lysosomal granule release in thrombin-stimulated platelets.** Samples from Munc18-1 (A and D), Munc18-2 (B and E), and Munc18-3 (C and F) mutant mice were stimulated with thrombin (1 U/ml). A-F, representative tracings of P-selectin (A-C) and LAMP-1 (D-F) translocated to the surface of washed platelets measured by flow cytometry.

**Table S1****Summary of results of secretion assays**

Results are ratios of the means of experiments presented in Figs. 2 and 3. We include only values from platelets of Munc18-1 $\Delta/\Delta$ , Munc18-2 $\Delta/\Delta$  and Munc18-3 $\Delta/\Delta$  mice, and from their respective F/F littermate controls.

| Assay                       | Agonist  | Condition  | Ratio: $\Delta/\Delta$ platelets / F/F platelets |          |          |
|-----------------------------|----------|------------|--------------------------------------------------|----------|----------|
|                             |          |            | Munc18-2                                         | Munc18-1 | Munc18-3 |
| Dense granules (ATP)        | Thrombin | Low        | 0.00 <sup>†</sup>                                | 1.06     | 1.30     |
|                             |          | High       | 0.02 <sup>*</sup>                                | 0.94     | 1.11     |
|                             | Collagen | Low        | 0.03 <sup>†</sup>                                |          |          |
|                             |          | High       | 0.06 <sup>†</sup>                                |          |          |
| Alpha granules (P-selectin) | Thrombin | Low        | 0.14 <sup>*</sup>                                | 1.24     | 1.09     |
|                             |          | High       | 0.16 <sup>*</sup>                                | 1.03     | 0.93     |
|                             |          | High + ADP | 0.15 <sup>*</sup>                                |          |          |
| Alpha granules (PF4)        | Thrombin | High       | 0.26 <sup>*</sup>                                |          |          |
|                             |          | High + ADP | 0.33 <sup>*</sup>                                |          |          |
|                             | Collagen | High       | 0.16 <sup>*</sup>                                |          |          |
|                             |          | High + ADP | 0.18 <sup>*</sup>                                |          |          |
| Lysosomal granules (LAMP-1) | Thrombin | Low        | 0.08 <sup>*</sup>                                | 0.79     | 1.39     |
|                             |          | High       | 0.03 <sup>*</sup>                                | 0.92     | 1.03     |
|                             |          | High + ADP | 0.10 <sup>†</sup>                                |          |          |

*p* values of comparing  $\Delta/\Delta$  to F/F: † =  $p \leq 0.01$ ; \* =  $p \leq 0.001$

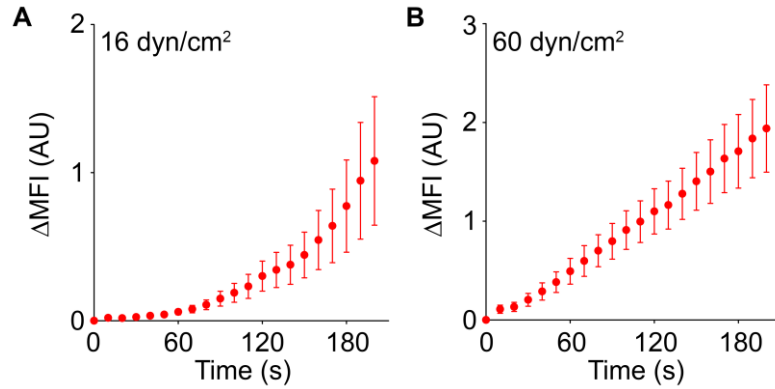

**Figure S3. Platelets lacking Munc18-2 adhere to collagen but do not form thrombi under shear stress.** Data from Munc18-2 <sup>$\Delta/\Delta$</sup>  platelets from Fig. 3, C and E, where we showed that in the absence of Munc18-2 platelets failed to form thrombi, is presented in a different scale. Whole blood was fluorescently-labeled and perfused over collagen-coated plates at low (A) or high (B) shear stress. The slight increase in fluorescence intensity above baseline ( $\Delta\text{MFI}$ ) over time represent adhesion of platelets to the collagen layer.
